1 **Longitudinal survey reveals delayed effects of forager gene**  
2 **expression on stingless bee colony health**

3

4 Lílian Caesar<sup>1</sup>, Anelise Martins Correa Lopes<sup>2</sup>, Jefferson Nunes Radaeski<sup>3</sup>, Soraia Girardi  
5 Bauermann<sup>3</sup>, Enéas Ricardo Konzen<sup>4</sup>, Jean-François Pombert<sup>5</sup>, Aroni Sattler<sup>6</sup>, Betina Blochtein<sup>7</sup>,  
6 Airton Torres Carvalho<sup>8</sup>, Karen Luisa Haag<sup>1,2\*</sup>.

7

8 <sup>1</sup> Programa de Pós-Graduação em Genética e Biologia Molecular, Universidade Federal do Rio  
9 Grande do Sul, Porto Alegre, RS, Brazil.

10 <sup>2</sup> Departamento de Genética, Instituto de Biociências, Universidade Federal do Rio Grande, Porto  
11 Alegre, RS, Brazil.

12 <sup>3</sup> Laboratório de Palinologia, Universidade Luterana do Brasil, Canoas, RS, Brazil.

13 <sup>4</sup> Centro de Estudos Costeiros Limnológicos e Marinhos, Universidade Federal do Rio Grande do Sul,  
14 Imbé, RS, Brazil.

15 <sup>5</sup> Department of Biology, Illinois Institute of Technology, Chicago, Illinois, USA.

16 <sup>6</sup> Laboratório de Apicultura, Faculdade de Agronomia, Universidade Federal do Rio Grande do Sul,  
17 Porto Alegre, RS, Brazil.

18 <sup>7</sup> Escola de Ciências da Saúde e da Vida, Pontifícia Universidade Católica do Rio Grande do Sul,  
19 Porto Alegre, RS, Brazil;

20 <sup>8</sup> Unidade Acadêmica de Serra Talhada, Universidade Federal Rural de Pernambuco, Serra Talhada,  
21 PE, Brazil.

22

23 \* Corresponding author: karen.haag@ufrgs.br

24

25 **Keywords:** stingless bee, *Melipona quadrifasciata*, bee health, colony collapse, sublethal effects.

26

27

28

29

30

31 **Abstract**

32

33 Bee populations are declining globally due to different environmental stressors, such as pathogens,  
34 malnutrition, and agrochemicals. Brazil is the home of hundreds of stingless bee species, some of  
35 them now considered endangered, though very little is known about the impact of disease on native  
36 bees. In Southern Brazil the endangered stingless bee *Melipona quadrifasciata* is affected by an  
37 annual syndrome that causes sudden death of workers, eventually leading colonies to collapse.  
38 Although novel viruses were found in foragers from diseased colonies, none has been consistently  
39 implicated in the outbreak. Here we used transcriptomics in combination with an integrative  
40 longitudinal survey on managed colonies to identify predictors for preventing *M. quadrifasciata* colony  
41 failures. We found that key genes related to xenobiotic metabolism, nutrition and immune  
42 responses are downregulated in foragers from colonies that became diseased three months later. The  
43 period that preceded the outbreak was marked by pronounced forager weight loss as well as  
44 behavioural changes. Our findings support the proposition that worldwide bee mortality is influenced  
45 by a combination of diverse sublethal factors, and increase awareness of the long-term effects of  
46 genetic diversity erosion in stingless bee species, which enhances their vulnerability to environmental  
47 stressors.

48

49 **Introduction**

50

51 The worldwide decrease in bee populations observed in the last decade is a matter of great  
52 concern. Some colony losses are explained by the presence of pathogens and other infectious agents  
53 [1,2], but several additional interacting stressors, such as habitat loss, malnutrition, agrochemicals and  
54 colony management practices are known to reduce the fitness of bee populations [3]. Theoretical  
55 studies indicate that although multifactorial stresses may cause colony failure, it is most likely a result  
56 of a critical level of stress from the accumulation of sublethal factors [4].

57

58 One of the intrinsic properties of sublethal factors is their delayed effect on organismal fitness.  
59 In eusocial bees, where individual fitness is achieved indirectly by cooperation, sublethal factors  
60 characteristically compromise the ability of non-reproductive females to perform their regular tasks [5].  
For example, honey bee workers reared in pollen-stressed colonies show normal development, but as

61 adults are less likely to waggle dance, and precisely inform food location [6]. Exposure of larvae to  
62 sublethal doses of pesticides induces multiple changes in gene expression, leading to developmental  
63 and adult behavioural changes that weaken bee colonies [5,7]. Besides interacting with each other,  
64 environmental stressors are modulated by endogenous factors that are ultimately linked to the bee's  
65 genetic background [8]. Some bee management practices, including colony translocation, may lead to  
66 genetic homogenization, loss of genetic diversity, and the breakdown of local adaptations, finally  
67 impacting their capacity to respond to stressors [9,10].

68         The stingless bee *M. quadrifasciata* is one of the most extensively managed species and the  
69 object of intensive trading in Southern Brazil, where its nests virtually disappeared from nature [11]. In  
70 this region, the practice of colony division has been performed for decades and became more  
71 common with trade intensification [12], which is now threatened by a syndrome that annually occurs in  
72 late summer, often leading to colony collapse [13,14]. Some worker bees from affected colonies show  
73 neurologic symptoms, such as tremors and paralysis, suggesting the implication of viruses in the  
74 syndrome. However, in spite of having found novel viruses associated with symptomatic bees, such as  
75 dicistroviruses, which cause similar symptoms in *A. mellifera* [15], no virus [14] or other pathogen [13]  
76 was found consistently associated with bees from diseased colonies. Here we report an integrative  
77 and longitudinal study designed to uncover the causes underlying the annual syndrome of *M.*  
78 *quadrifasciata*. In addition to exploratory transcriptomic analyses, a temporal survey was conducted on  
79 three pairs of mother-daughter colonies kept in two separate localities, in order to evaluate the  
80 contribution of both genetic and environmental factors to the syndrome manifestation, by measuring  
81 individual- and colony-level traits.

82

## 83 **Materials and Methods**

84

### 85 **(a) Transcriptome analyses**

86         Three *M. quadrifasciata* colonies were sampled for exploratory transcriptomic analyses aiming  
87 to identify differentially expressed genes (DEGs) during the syndrome, and to select candidate genes  
88 for further analyses. Two colonies (D1 and D2) presented symptoms during the yearly outbreak, while  
89 the third (H) remained healthy and was sampled after the outbreak period. RNA of three pooled bees  
90 from each colony was purified by polyA-tail selection, followed by library construction using TruSeq

91 Stranded mRNA Library Prep Kit (Illumina, USA). Single-end sequencing (read length = 150 nt) was  
92 performed on an Illumina NextSeq instrument. Low quality reads were removed with Trimmomatic  
93 v.0.36 [16], and mapped onto *M. quadrifasciata* genome (GenBank: GCA\_001276565.1) with GSNAP  
94 v. 2018-07-04 [17]. Gene expression was estimated with the *depth* command from Samtools v.1.3.1  
95 [18], and DEGs were recovered with custom Perl scripts, after a normalization step (Available at  
96 [https://github.com/liliancaesar/Publication\\_scripts/tree/main/2020\\_Longitudinal\\_survey/Transcriptome](https://github.com/liliancaesar/Publication_scripts/tree/main/2020_Longitudinal_survey/Transcriptome)  
97 [\\_analyses](#)). Functional enrichment analysis was performed with g:Profiler [19]. Detailed information on  
98 the samples, nucleic acid extraction and transcriptome analyses are provided as electronic  
99 supplementary material (text S1). Three DEGs known for their roles in bee health were selected for  
100 RT-qPCR assays.

101

## 102 **(b) Monitoring bee colonies and forager relative gene expression**

103 To monitor changes of key biological features, observations were made in *M. quadrifasciata*  
104 mother-daughter (MD) colonies under semi-controlled conditions during six months in two localities.  
105 Three colonies (named BP1, BP2 and BP3) were kept in a small agricultural property where  
106 agrochemicals are regularly used. Daughter colonies obtained by division from each BP colony  
107 (named PA1, PA2 and PA3), were translocated to the vicinity of a secondary forest, located about 70  
108 km away from BP. Colonies were equipped with a datalogger device (ONSET, Brazil) to record within-  
109 hive temperature and humidity every six hours. Downstream analyses were conducted with the daily  
110 lowest temperature (t) and the highest humidity (h), or with a variable called delta ( $\Delta$  = maximum value  
111 - minimum value). Aliquots of pollen stored inside colonies were collected every month from the  
112 experimental hives or from nearby colonies in each meliponary. Around 500 pollen grains were  
113 identified at the family, genus, or species level, using reference material from pollen libraries and the  
114 literature (see electronic supplementary material, text S1). Every month five foragers (figure 1A) were  
115 collected, weighted, and stored at -80°C until RNA extraction for RT-qPCR.

116 Three DEGs were selected for monitoring forager bee expression patterns during the survey,  
117 namely putative mitochondrial *cytochrome P450* (*CYP450*; WN51\_04136), *phenoloxidase* (*PO*;  
118 WN51\_02761) and *apolipoporphin* (*ApoLp*; WN51\_14077). Primers based on each respective gene  
119 sequence were designed with Primer3 from Geneious R11 [20] (electronic supplementary material,  
120 table S1). Actin (*act*) and 40S ribosomal protein S5 (*rps5*) were used as references for gene

121 expression normalization [21–23]. StepOnePlus Real-Time PCR System (Applied Biosystems, USA)  
122 was used for the RT-qPCR assays, and primer amplification efficiency was calculated with qBASE+  
123 software [24] from the slope of a five-point 1:10 serial dilution of calibrator cDNA samples.  
124 Experimental setup of qPCR involved sample maximization method, three technical replicates for each  
125 sample, and inter-run calibrator samples [24]. The default of qBASE+ pipeline was used to calculate  
126 relative gene expression, and presented in the form of calibrated normalized relative quantities  
127 (CNRQ) [24]. Detailed information on sample processing and RT-qPCR quantifications is provided as  
128 electronic supplementary data (text S1).

129

### 130 **(c) Statistical analyses**

131 All analyses were conducted in R version 3.6.3 [25] and available at  
132 [https://github.com/liliancaesar/Publication\\_scripts/tree/main/2020\\_Longitudinal\\_survey/Statistical\\_anal](https://github.com/liliancaesar/Publication_scripts/tree/main/2020_Longitudinal_survey/Statistical_analyses)  
133 [yses](https://github.com/liliancaesar/Publication_scripts/tree/main/2020_Longitudinal_survey/Statistical_analyses). Data were tested for their fit to normality and variance homogeneity using Shapiro's and  
134 Bartlett's tests ( $P < 0.05$ ), respectively. When applicable, package MASS [26] was used for Box-Cox  
135 transformation of non-normal and non-homogeneous data. Temporal differences in forager weight  
136 were assessed by one-way ANOVA using "month" as factor. Monthly differences of daily variations in  
137 colony temperature and humidity ( $\Delta t$  and  $\Delta h$ ) were tested with Kruskal-Wallis. To test whether  
138 unhealthy colonies were on average cooler and/or more humid, the March daily lowest temperatures  
139 and highest humidities were analysed by Mann-Whitney. The package Laercio [27] was used for mean  
140 comparisons with Tukey's test, and PMCMRplus [28] for Nemenyi's test. Forager CNRQ differences  
141 for *CYP450*, *PO* and *ApoLp* were evaluated by one-way ANOVA using "month" and "colony" as factors  
142 separately. Taking into account that the syndrome occurs in March, and that colonies have been  
143 monitored from January until April, a two-way ANOVA using either "colony", "MD colonies", "health  
144 status" or "intensity" combined with "month" as factors was also performed, enabling us to identify  
145 gene expression effects in specific periods during the course of our survey. Pearson's correlation  
146 coefficients among all traits were calculated with package Hmisc [29].

147

## 148 **Results**

149

### 150 **(a) Differentially expressed genes in diseased colonies**

151 Transcriptome sequencing of D1, D2 and H foragers yielded 99,766,936, 102,034,731 and  
152 135,982,124 single-end high quality-trimmed reads, respectively. From all reads, 87-99% mapped  
153 against the *M. quadrifasciata* genome. A total of 558 DEGs were found comparing bees from healthy  
154 and both diseased colonies, with 493 downregulated in foragers from diseased colonies (figure 1B;  
155 electronic supplementary material, table S2). Membrane components (GO:0016020 and GO:0016020)  
156 are significantly enriched in DEGs (figure 1C; electronic supplementary material, table S3), from which  
157 the vast majority is downregulated, representing major deficits in bees affected by the syndrome. To  
158 our knowledge, most of the highly differentially expressed genes were never directly implicated in bee  
159 health. Therefore, three DEGs homologous to genes commonly found differentially expressed in  
160 unhealthy bees from other species were chosen to quantify temporal variations in gene expression in  
161 foragers under semi-controlled conditions using RT-qPCR, *i.e.*, *CYP450*, *PO* and *ApoLp* (electronic  
162 supplementary material, table S4). *CYP450* and *ApoLp* are both downregulated in our transcriptomes  
163 from diseased colonies, but curiously *PO* showed inconsistent patterns of differential expression in D1  
164 and to D2 relative to H.

165

#### 166 **(b) Outcomes of the survey**

167 Among the six colonies monitored monthly in our study, four manifested signs of the syndrome  
168 in March 2019. Colonies BP2 and BP3 manifested the strongest signs of disease, with high mortality  
169 of workers, and some bees showing tremors or paralysis. Their respective daughter colonies PA2 and  
170 PA3 showed less intense signs and were characterized as mildly diseased. We rule out the possibility  
171 that bees died due to lethal doses of agrochemicals, since residue analyses did not indicate  
172 contamination by agrochemical compounds in bees from diseased colonies (data not shown). MD  
173 colony pair BP1 and PA1 did not manifest health alterations.

174

#### 175 **(c) Temporal variation in gene expression**

176 There was a significant temporal variation in the transcription of *CYP450* ( $P = 0.009$ ), with  
177 peaks in March in both foragers from healthy and diseased colonies, and in January only in healthy  
178 ones (figure 1D). Monthly variations in *CYP450*, *PO* and *ApoLp* gene expression showed similar  
179 interactions with the colony health status ( $P = 0.0103$ ,  $0.0152$  and  $< 0.0005$ , respectively), and  
180 foragers from colonies that remained healthy during the outbreak period showed the highest

181 expression of these three genes in January (figure 1D).

182

#### 183 **(d) Changes in worker bee nutrition and colony microclimate**

184 We found a marked reduction in forager weight from January until March ( $P < 0.0005$ ; figure  
185 2A), with the lowest average weight reached during the syndrome outbreak (March). From January to  
186 February we observed a sudden change in the pollen stored by worker bees, *i.e.*, its composition  
187 shifted from Myrtaceae (as *Eucalyptus* sp.) to Fabaceae (mainly *Mimosa bimucronata*; figure 2B). Bee  
188 weight reduction was accompanied by a reduction in the internal temperature of colonies ( $r = 0.63$ ,  $P =$   
189  $0.0088$ ), and increase in humidity ( $r = -0.58$ ,  $P = 0.0179$ ; electronic supplementary material, figure S1).  
190 This pattern was more pronounced in colonies that became diseased during the outbreak, *i.e.*, MD  
191 colonies 2 (BP2 and PA2;  $P < 0.0005$ ). Furthermore, temperature was lowest ( $P < 0.0005$ ) and  
192 humidity was highest ( $P < 0.0005$ ) inside diseased colonies when the syndrome symptoms were first  
193 observed in March (figure 2C). The highest differences in daily temperature and humidity within  
194 colonies occurred from December to March ( $P < 0.0005$ ; figure 2D).

195

#### 196 **Discussion**

197

198 Our study revealed that both genetic and environmental factors influence the annual *M.*  
199 *quadrifasciata* syndrome. Mother-daughter colonies, exhibiting an average genetic relatedness of  
200 0.375 [30], showed similar health status during the outbreak, despite having been kept in different  
201 localities. We suspect that the routine practice of colony division, associated with the concomitant loss  
202 of wild nests, may have reduced the genetic diversity of *M. quadrifasciata* populations. Reduced  
203 genetic diversity may have affected stingless bees to properly respond to environmental stresses in  
204 the form of sublethal effects such as pesticides, pathogens, and limited food resources, predisposing  
205 them to disease. We found that symptoms of worker bees were stronger in two affected colonies  
206 located nearby an agricultural setting. Thus, two lines of evidence allow us to identify some of the  
207 mechanisms involved in a higher susceptibility to disease, and eventually colony failure, possibly  
208 through the impairment of forager responses to interacting stressors.

209

210 Firstly, our exploratory transcriptomic analyses showed that components of the cellular  
membrane, representing the layer that directly communicates with the environment, are enriched with

211 DEGs that are downregulated in foragers from colonies affected by disease. Furthermore, enrichment  
212 analysis also indicated a slight over representation of lipid metabolic processes and oxidoreductase  
213 molecular functions, which were previously shown to respond to pesticides in honey bees [7].  
214 Secondly, foragers from our surveyed colonies affected by the syndrome in March expressed  
215 significantly less *CYP450*, *ApoLp* and *PO* in January. Bees rely on CYP450s for xenobiotic  
216 detoxification, which determines their sensitivity to agrochemicals [31]. ApoLp is a major component of  
217 the honey bee royal jelly [32] and is responsible for lipid transport, being mostly involved in innate  
218 immunity [33]. PO is an enzyme responsible for activating melanogenesis, an important defense  
219 mechanism of insects, and considered as an indicator of health condition strongly influenced by diet  
220 [34]. Thus, it is not surprising that the expression patterns of these three genes (specially *ApoLp* and  
221 *PO*) are so remarkably similar in our survey, suggesting the combined involvement of three  
222 physiological processes in the *M. quadrifasciata* syndrome, *i.e.*, xenobiotic detoxification, immunity  
223 and nutrition.

224 Agrochemicals are known to reduce ApoLp levels in honey bees [35], and increase their  
225 demand for food [36]. Pollen stress in turn may lead to developmental and behavioural impairment [6].  
226 Moreover, January is characterized by a high density of pollinators in general, including *A. mellifera*,  
227 creating opportunities for getting in contact with a larger diversity of pathogens. In our study,  
228 pronounced forager weight loss occurred between January and March, as well as a shift in the pollen  
229 stored by worker bees from Myrtaceae to mostly *Mimosa bimucronata* between January and February.  
230 Such a shift may result from the opportunity to forage *Mimosa*, that starts to bloom in February, and  
231 from competitive exclusion, since *M. quadrifasciata* apparently competes with *A. mellifera* for  
232 Myrtaceae flowers [37]. Interestingly, two months after *M. quadrifasciata* initiated storing *M.*  
233 *bimucronata*, a gradual recovery of forager weight was noticed. Colony recovery after the outbreak  
234 period is also suggested by a better performance of worker bees in controlling their nest  
235 microenvironment, as observed by the reduced differences in colony daily temperature and humidity in  
236 April and May.

237 Unfortunately, we cannot rule out that the differences we observed in forager gene expression  
238 are due to age differences. *Melipona* spp. development takes around 40 days from egg to adult [38],  
239 thus *M. quadrifasciata* foragers sampled during the outbreak in March were immatures in January.  
240 However, age polyethism in bees is known to be a labile feature, since forager differentiation from



241 nurses might be accelerated if the colony weakens [39]. Conducting invasive studies with stingless  
242 bees is not straightforward. Their colonies are much smaller than honey bees, semi-wild, and present  
243 a number of significant challenges for conducting experiments avoiding the side effects of excessive  
244 manipulation. Although four of the six colonies surveyed in our study manifested some degree of the  
245 syndrome symptoms, none of them collapsed during the outbreak period. We think that the annual  
246 collapses reported for *M. quadrifasciata* colonies in Southern Brazil could result from positive density  
247 dependence influenced by the combination of diverse sublethal factors [4,40]. The complexity of  
248 causes behind worldwide colony collapses demand efforts to sustain pollination services. Based on  
249 our findings, actions such as limiting the use of agrochemicals in the vicinity of managed colonies and  
250 providing abundant natural polyfloral resources through the conservation of native forests could help  
251 prevent the annual *M. quadrifasciata* syndrome. Furthermore, it warrants a better understanding of the  
252 impact of management practices on stingless bee genetic diversity and fitness.

253

#### 254 **Acknowledgments**

255 We thank the beekeeper Evald Gossler for making his meliponary available for the survey,  
256 and for collaborating throughout the whole survey. We also thank the beekeeper Gilson Maas for  
257 providing bee samples for our study.

258

#### 259 **Funding**

260 Funding was provided by Fundação de Amparo à Pesquisa do Estado do Rio Grande do Sul  
261 and Conselho Nacional de Desenvolvimento Científico e Tecnológico (FAPERGS/CNPq 12/2014 –  
262 PRONEX, protocol #19694.341.13831.26012015, CNPq/MCTIC/IBAMA/ Associação ABELHA  
263 #400597/2018-7, and CNPq PQ #302121/2017-0). LC was supported by Coordenação de  
264 Aperfeiçoamento de Pessoal de Nível Superior (CAPES; Finance Code 001).

265

266

#### 267 **References**

- 268 1. Evans JD, Schwarz RS. 2011 Bees brought to their knees: microbes affecting honey bee health.  
269 *Trends Microbiol.* **19**, 614–620. (doi:10.1016/j.tim.2011.09.003)
- 270 2. Schwarz RS, Huang Q, Evans JD. 2015 Hologenome theory and the honey bee pathosphere.

- 271 *Curr. Opin. Insect Sci.* **10**, 1–7. (doi:10.1016/j.cois.2015.04.006)
- 272 3. Goulson D, Nicholls E, Botías C, Rotheray EL. 2015 Bee declines driven by combined stress from  
273 parasites, pesticides, and lack of flowers. *Science* **347**. (doi:10.1126/science.1255957)
- 274 4. Bryden J, Gill RJ, Mitton RAA, Raine NE, Jansen VAA. 2013 Chronic sublethal stress causes bee  
275 colony failure. *Ecol. Lett.* **16**, 1463–1469. (doi:10.1111/ele.12188)
- 276 5. Berenbaum MR, Liao L-H. 2019 Honey Bees and Environmental Stress: Toxicologic Pathology of  
277 a Superorganism. *Toxicol. Pathol.* **47**, 1076–1081. (doi:10.1177/0192623319877154)
- 278 6. Scofield HN, Mattila HR. 2015 Honey Bee Workers That Are Pollen Stressed as Larvae Become  
279 Poor Foragers and Waggle Dancers as Adults. *PLOS ONE* **10**, e0121731.  
280 (doi:10.1371/journal.pone.0121731)
- 281 7. Wu M-C, Chang Y-W, Lu K-H, Yang E-C. 2017 Gene expression changes in honey bees induced  
282 by sublethal imidacloprid exposure during the larval stage. *Insect Biochem. Mol. Biol.* **88**, 12–20.  
283 (doi:10.1016/j.ibmb.2017.06.016)
- 284 8. Poquet Y, Vidau C, Alaux C. 2016 Modulation of pesticide response in honeybees. *Apidologie* **47**,  
285 412–426. (doi:10.1007/s13592-016-0429-7)
- 286 9. Jaffé R *et al.* 2016 Beekeeping practices and geographic distance, not land use, drive gene flow  
287 across tropical bees. *Mol. Ecol.* **25**, 5345–5358. (doi:10.1111/mec.13852)
- 288 10. Espregueira Themudo G, Rey-Iglesia A, Robles Tascón L, Bruun Jensen A, da Fonseca RR,  
289 Campos PF. 2020 Declining genetic diversity of European honeybees along the twentieth century.  
290 *Sci. Rep.* **10**, 10520. (doi:10.1038/s41598-020-67370-2)
- 291 11. Fundação Zoobotânica. 2014 Lista das espécies da fauna ameaçadas de extinção no Rio Grande  
292 do Sul. URL: [https://secweb.procergs.com.br/livlof/?id\\_modulo=1&id\\_uf=23&ano=2012](https://secweb.procergs.com.br/livlof/?id_modulo=1&id_uf=23&ano=2012) (accessed  
293 4.18.2020).
- 294 12. Jaffé R *et al.* 2015 Bees for development: Brazilian survey reveals how to optimize stingless  
295 beekeeping. *PLOS ONE* **10**, e0121157. (doi:10.1371/journal.pone.0121157)
- 296 13. Díaz S, de Souza Urbano S, Caesar L, Blochtein B, Sattler A, Zuge V, Haag KL. 2017 Report on  
297 the microbiota of *Melipona quadrifasciata* affected by a recurrent disease. *J. Invertebr. Pathol.*  
298 **143**, 35–39. (doi:10.1016/j.jip.2016.11.012)
- 299 14. Caesar L, Cibulski SP, Canal CW, Blochtein B, Sattler A, Haag KL. 2019 The virome of an  
300 endangered stingless bee suffering from annual mortality in southern Brazil. *J. Gen. Virol.* **100**,

- 301 1153–1164. (doi:10.1099/jgv.0.001273)
- 302 15. Genersch E, Aubert M. 2010 Emerging and re-emerging viruses of the honey bee (*Apis mellifera*  
303 L.). *Vet. Res.* **41**, 54. (doi:10.1051/vetres/2010027)
- 304 16. Bolger AM, Lohse M, Usadel B. 2014 Trimmomatic: a flexible trimmer for Illumina sequence data.  
305 *Bioinformatics* **30**, 2114–2120. (doi:10.1093/bioinformatics/btu170)
- 306 17. Wu TD, Reeder J, Lawrence M, Becker G, Brauer MJ. 2016 GMAP and GSNAP for Genomic  
307 Sequence Alignment: Enhancements to Speed, Accuracy, and Functionality. *Methods Mol. Biol.*  
308 *Clifton NJ* **1418**, 283–334. (doi:10.1007/978-1-4939-3578-9\_15)
- 309 18. Li H, Handsaker B, Wysoker A, Fennell T, Ruan J, Homer N, Marth G, Abecasis G, Durbin R.  
310 2009 The Sequence Alignment/Map format and SAMtools. *Bioinformatics* **25**, 2078–2079.  
311 (doi:10.1093/bioinformatics/btp352)
- 312 19. Raudvere U, Kolberg L, Kuzmin I, Arak T, Adler P, Peterson H, Vilo J. 2019 g:Profiler: a web  
313 server for functional enrichment analysis and conversions of gene lists (2019 update). *Nucleic*  
314 *Acids Res.* **47**, W191–W198. (doi:10.1093/nar/gkz369)
- 315 20. Kearsse M *et al.* 2012 Geneious Basic: an integrated and extendable desktop software platform for  
316 the organization and analysis of sequence data. *Bioinforma. Oxf. Engl.* **28**, 1647–1649.  
317 (doi:10.1093/bioinformatics/bts199)
- 318 21. Evans JD *et al.* 2006 Immune pathways and defence mechanisms in honey bees *Apis mellifera*.  
319 *Insect Mol. Biol.* **15**, 645–656. (doi:10.1111/j.1365-2583.2006.00682.x)
- 320 22. Brito DV, Silva CGN, Hasselmann M, Viana LS, Astolfi-Filho S, Carvalho-Zilse GA. 2015  
321 Molecular characterization of the gene feminizer in the stingless bee *Melipona interrupta*  
322 (Hymenoptera: Apidae) reveals association to sex and caste development. *Insect Biochem. Mol.*  
323 *Biol.* **66**, 24–30. (doi:10.1016/j.ibmb.2015.09.008)
- 324 23. Freitas FCP, Depintor TS, Agostini LT, Luna-Lucena D, Nunes FMF, Bitondi MMG, Simões ZLP,  
325 Lourenço AP. 2019 Evaluation of reference genes for gene expression analysis by real-time  
326 quantitative PCR (qPCR) in three stingless bee species (Hymenoptera: Apidae: Meliponini). *Sci.*  
327 *Rep.* **9**, 1–13. (doi:10.1038/s41598-019-53544-0)
- 328 24. Hellemans J, Mortier G, De Paepe A, Speleman F, Vandesompele J. 2007 qBase relative  
329 quantification framework and software for management and automated analysis of real-time  
330 quantitative PCR data. *Genome Biol.* **8**, R19. (doi:10.1186/gb-2007-8-2-r19)

- 331 25. R Core Team. 2019 R: A language and environment for statistical computing. R Foundation for  
332 Statistical Computing, Vienna, Austria. URL: <http://www.R-project.org/>
- 333 26. Venables WN, Ripley BD. 2002 *Modern Applied Statistics with S*. 4th edn. New York: Springer-  
334 Verlag. (doi:10.1007/978-0-387-21706-2)
- 335 27. Silva LJD. 2015 Package laercio. URL: <https://cran.r-project.org/web/packages/laercio/laercio.pdf>
- 336 28. Pohlert T. 2020 PMCMRplus: Calculate Pairwise Multiple Comparisons of Mean Rank Sums  
337 Extended. R package version 1.4.4. URL: <https://CRAN.R-project.org/package=PMCMRplus>
- 338 29. Harrell Jr FE, with contributions from Charles Dupont and many others. 2020 Hmisc: Harrell  
339 Miscellaneous. R package version 4.4-1. URL: <https://CRAN.R-project.org/package=Hmisc>
- 340 30. Oliveira KN *et al.* 2015 Parâmetros genéticos para características produtivas e biométricas em  
341 abelha *Melipona quadrifasciata anthidioides* LEPELETIER. *Arq. Bras. Med. Veterinária E Zootec.*  
342 **67**, 819–826. (doi:10.1590/1678-4162-6804)
- 343 31. Manjon C *et al.* 2018 Unravelling the Molecular Determinants of Bee Sensitivity to Neonicotinoid  
344 Insecticides. *Curr. Biol. CB* **28**, 1137-1143.e5. (doi:10.1016/j.cub.2018.02.045)
- 345 32. Han B, Li C, Zhang L, Fang Y, Feng M, Li J. 2011 Novel royal jelly proteins identified by gel-based  
346 and gel-free proteomics. *J. Agric. Food Chem.* **59**, 10346–10355. (doi:10.1021/jf202355n)
- 347 33. Kim BY, Jin BR. 2015 Apolipophorin III from honeybees (*Apis cerana*) exhibits antibacterial  
348 activity. *Comp. Biochem. Physiol. B Biochem. Mol. Biol.* **182**, 6–13.  
349 (doi:10.1016/j.cbpb.2014.11.010)
- 350 34. González-Santoyo I, Córdoba-Aguilar A. 2012 Phenoloxidase: a key component of the insect  
351 immune system. *Entomol. Exp. Appl.* **142**, 1–16. (doi:10.1111/j.1570-7458.2011.01187.x)
- 352 35. Nicodemo D, Jong DD, Reis LG, Almeida JMV de, Santos AA dos, Lisboa LAM. 2018 Transgenic  
353 corn decreased total and key storage and lipid transport protein levels in honey bee hemolymph  
354 while seed treatment with imidacloprid reduced lipophorin levels. *J. Apic. Res.* **57**, 321–328.  
355 (doi:10.1080/00218839.2017.1391530)
- 356 36. Balieira KVB, Mazzo M, Bizerra PFV, Guimarães AR de JS, Nicodemo D, Mingatto FE. 2018  
357 Imidacloprid-induced oxidative stress in honey bees and the antioxidant action of caffeine.  
358 *Apidologie* **49**, 562–572. (doi:10.1007/s13592-018-0583-1)
- 359 37. Wilms W, Wiechers B. 1997 Floral resource partitioning between native *Melipona* bees and the  
360 introduced Africanized honey bee in the Brazilian Atlantic rain forest. *Apidologie* **28**, 339–355.

- 361 (doi:10.1051/apido:19970602)
- 362 38. Alves DA, Imperatriz-Fonseca VL, Franco TM, Santos-Filho PS, Nogueira-Neto P, Billen J,  
363 Wenseleers T. 2009 The queen is dead—long live the workers: intraspecific parasitism by workers  
364 in the stingless bee *Melipona scutellaris*. *Mol. Ecol.* **18**, 4102–4111. (doi:10.1111/j.1365-  
365 294X.2009.04323.x)
- 366 39. Huang Z-Y, Robinson GE. 1999 Social control of division of labor in honey bee colonies. In  
367 *Information Processing in Social Insects* (eds C Detrain, JL Deneubourg, JM Pasteels), pp. 165–  
368 186. Basel: Birkhäuser. (doi:10.1007/978-3-0348-8739-7\_9)
- 369 40. Khoury DS, Myerscough MR, Barron AB. 2011 A quantitative model of honey bee colony  
370 population dynamics. *PLOS ONE* **6**, e18491. (doi:10.1371/journal.pone.0018491)
- 371
- 372

373 **Figure legends:**

374

375 **Figure 1:** (A) *Melipona quadrifasciata* worker bee (Fototeca Cristiano Menezes,

376 <http://www.splink.org.br/search?lang=en&collectioncode=FCM>). (B) Venn diagram showing

377 differentially expressed genes (DEGs) up or downregulated in foragers from diseased colonies (D1 or

378 D2). (C) Functional overview of DEGs based on gene ontology annotation ( $P < 1$ ), with the asterisk

379 indicating GO terms enriched in the DEGs ( $P < 0.05$ ). Bars are sorted according to biological

380 processes (BP), molecular function (MF) and cellular component (CC). (D) Barplot comparing relative

381 expression (CNRQ) of *CYP450*, *PO* and *ApoLp* in foragers from colonies that remained healthy (H),

382 with those that showed signs of disease (D) during the outbreak period. Bars indicate the standard

383 error; uppercase letters indicate significant differences among months, and lowercase letters indicate

384 significant differences between healthy and unhealthy colonies within months, according to Tukey's

385 test ( $P < 0.05$ ).

386

387 **Figure 2:** (A) Boxplot showing the monthly variation in average forager weight. (B) Barplot showing

388 the monthly variation in stored pollen, revealing a switch between January and February. (C) Line plot

389 of the minimum daily temperature and maximum daily humidity in March, in which the colors identify

390 colonies that remained healthy (shades of green) or became diseased (shades of purple) during the

391 outbreak period (horizontal bars). (D) Barplot showing the average daily difference in maximum vs.

392 minimum colony temperature ( $\Delta t$ ) and humidity ( $\Delta h$ ). Vertical bars indicate the standard error;

393 lowercase letters represent significant differences according to (A) Tukey's test or (D) Nemenyi's test

394 ( $P < 0.05$ ).

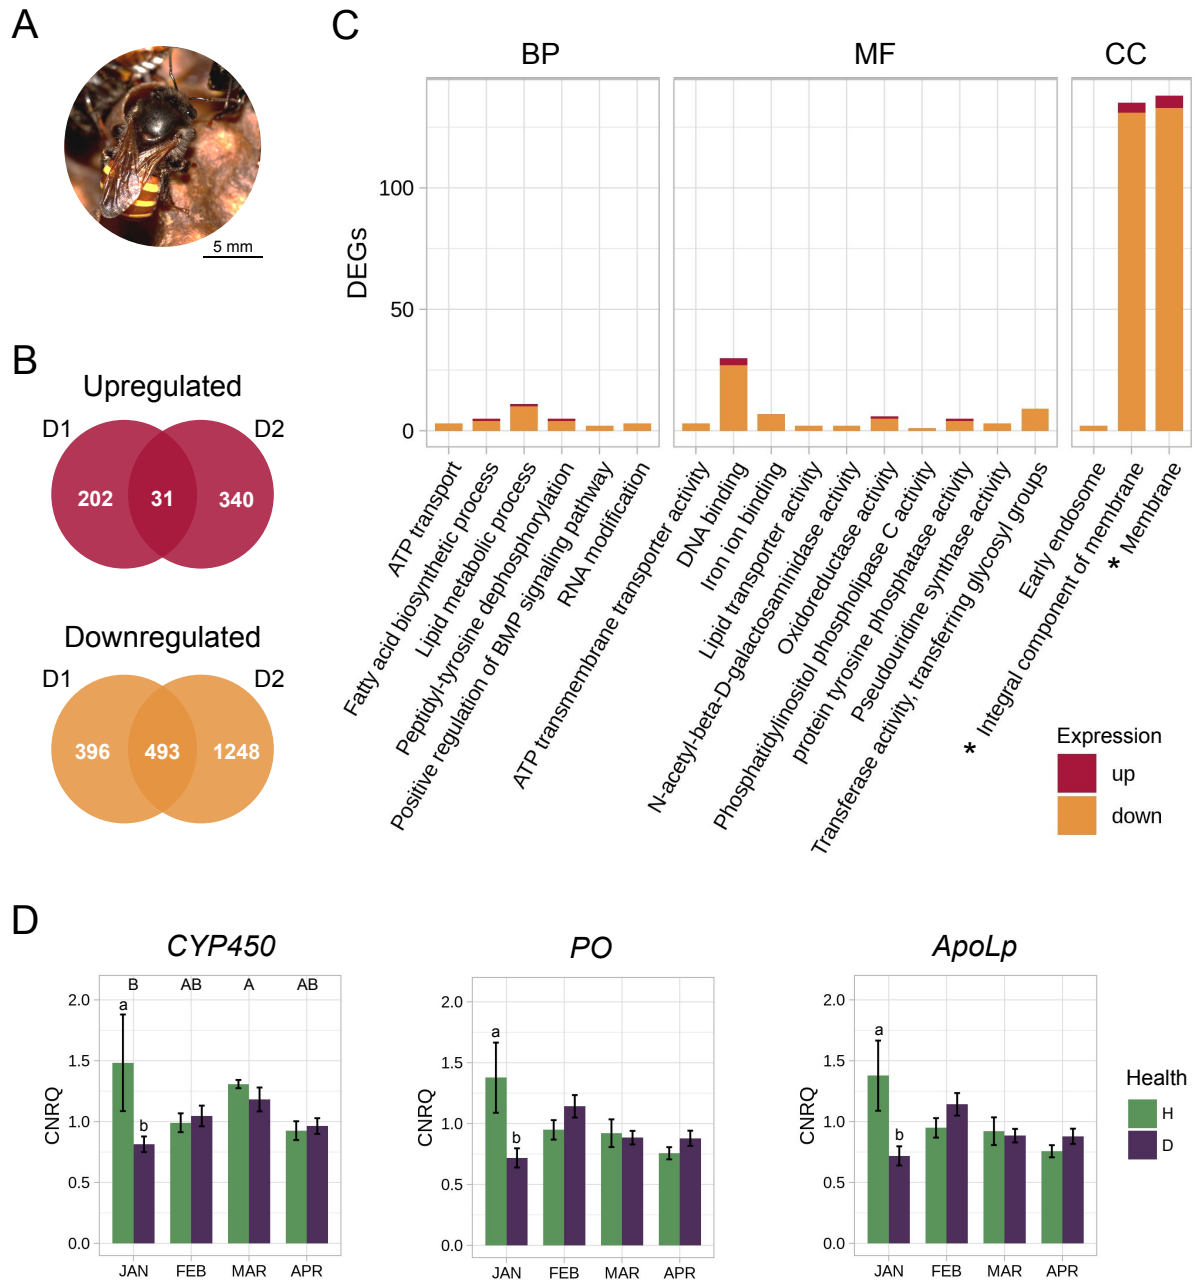

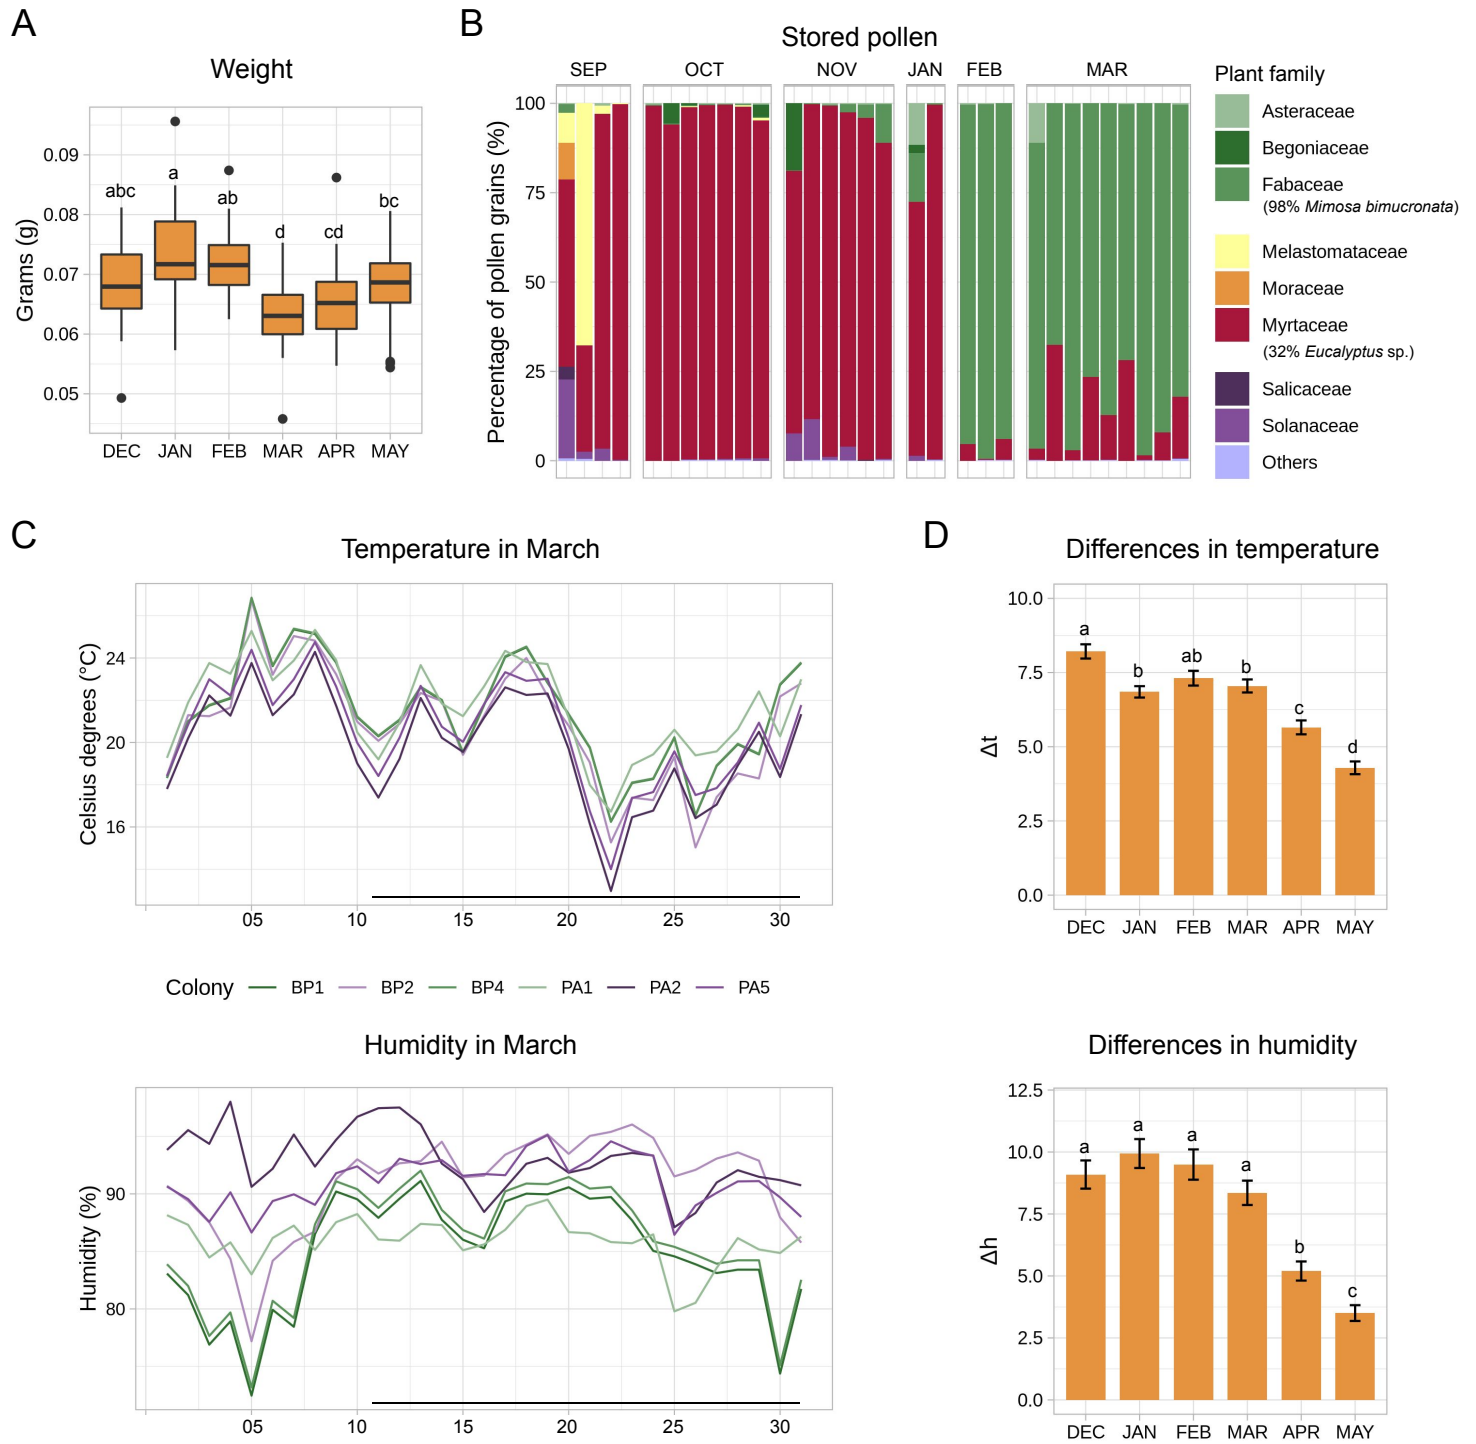

Source: https://www.biorxiv.org/content/10.1101/2020.10.13.337527v1.full.pdf
