# Supplementary material for: Longitudinal survey reveals delayed effects of forager gene expression on stingless bee colony health
Source: bioRxiv or medRxiv preprint supplement (doi:10.1101/2020.10.13.337527), 2020-10-14
Supplement: Supplementary file [file media-1.pdf]

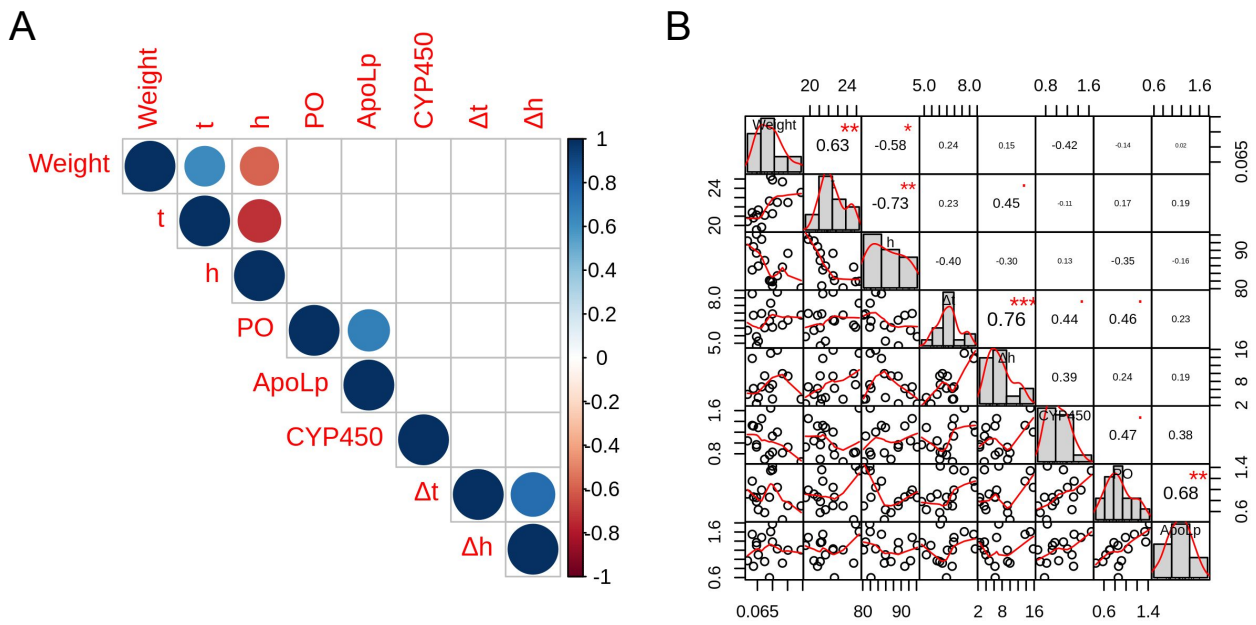

**Figure S1:** Pearson correlation matrix of all quantified traits at colony- and individual-level. (A) Significant positive and negative correlations are displayed in blue and red circles, respectively ( $P < 0.05$ ). Color intensity is proportional to the correlation coefficients ( $r$ ), highlighted in the matrix on the right. (B) In addition to the correlation coefficient ( $P$  codes '\*\*\*\*' 0.001, '\*\*\*' 0.01, '\*\*' 0.05, '.' 0.1, ' ' 1), the matrix presents histograms with kernel density estimation, and scatter plots with fitted line.
